# Supplementary material for: Placental CpG methylation of infants born extremely preterm predicts cognitive impairment later in life
Source: PLoS One. 2018 Mar 7;13(3):e0193271. doi: 10.1371/journal.pone.0193271 (PMC5841757; doi:10.1371/journal.pone.0193271)
Supplement: S2 Table — Logistic regression modeling identified 17 DMPs that predicted a significantly greater risk of neurocognitive impairment (LPA score = 3 or 4 versus LPA score = 1 or 2) at 10 year of age. In a sensitivity analysis excluding 18 autistic individuals, 12 (71%) DMPs remained significant. (XLSX) [file pone.0193271.s002.xlsx]

## Sheet: Model 5 Results Compiled and An
Probes			Overall			Autism Sensitvity Analysis
CpG Site	Associated Gene	Intragene Region	Beta Estimate	P-Value	Parameter-Likelihood Odds Raio Estimate (95% Confidence Interval)	Beta Estimate	P-Value	Parameter-Likelihood Odds Raio Estimate (95% Confidence Interval)
cg01288184	CABLES1	Body	0.0671508	0.0055	1.07 (1.02 - 1.12)	0.11783	0.0046	1.13 (1.04 - 1.22)
cg03345232	RIN3	Body	0.0758248	0.0098	1.08 (1.02 - 1.14)	0.117016	0.0078	1.12 (1.03 - 1.23)
cg08087657	RDH13	TSS1500	0.07	0.0131	1.07 (1.01 - 1.12)	0.0887185	0.0386	1.09 (1.00 - 1.19)
cg08003402	SH3BP5	Body	0.0535142	0.0158	1.05 (1.01 - 1.10)	0.0642903	0.0335	1.07 (1.01 - 1.13)
cg02499214	RHOF	Body	0.065959	0.0164	1.07 (1.01 - 1.13)	0.0679872	0.0605	1.07 (1.00 - 1.15)
cg08698835	GNAO1	Body	0.0559137	0.018	1.06 (1.01 - 1.11)	0.0514969	0.1226	1.05 (0.99 - 1.12)
cg06164260	BCL6	5'UTR	0.0533294	0.0203	1.05 (1.01 - 1.10)	0.109413	0.0039	1.12 (1.04 - 1.20)
cg16548911	ADCY7	Body	0.0533306	0.0249	1.05 (1.01 - 1.11)	0.128787	0.0017	1.14 (1.05 - 1.23)
cg13724311	CLDN7	3'UTR	0.0569406	0.026	1.06 (1.01 - 1.11)	0.120634	0.0099	1.13 (1.03 - 1.24)
cg08612539	NCF4	5'UTR	0.0501205	0.0264	1.05 (1.01 - 1.10)	0.0944972	0.0077	1.10 (1.03 - 1.18)
cg10341242	ADCY7	Body	0.061927	0.0351	1.06 (1.00 - 1.13)	0.143924	0.0025	1.15 (1.05 - 1.27)
cg20663219	STX1A	Body	0.0479689	0.0362	1.05 (1.00 - 1.10)	0.0619276	0.0607	1.06 (1.00 - 1.14)
cg08202226	GATAD2B	TSS1500	0.0538073	0.037	1.06 (1.00 - 1.11)	0.119049	0.0049	1.13 (1.04 - 1.22)
cg14993900	TFAP2A	TSS1500	0.0470304	0.0388	1.05 (1.00 - 1.10)	0.0712084	0.0361	1.07 (1.00 - 1.15)
cg25032603	C21orf82	Body	0.0431097	0.0421	1.04 (1.00 - 1.09)	0.0600845	0.0392	1.06 (1.00 - 1.12)
cg25845463	PRKCZ	5'UTR	0.0398317	0.0485	1.04 (1.00 - 1.08)	0.0436351	0.1056	1.04 (0.99 - 1.10)
cg17850498	ECE1	Body	0.0366418	0.0487	1.04 (1.00 - 1.08)	0.0517024	0.0985	1.05 (0.99 - 1.12)
